# Supplementary material for: A comparative study of anthropogenic CH 4 emissions over China based on the ensembles of bottom-up inventories
Source: Copernicus journal article supplement (doi:10.5194/essd-13-1073-2021), 2021-03-15
Supplement: Supplementary file 1 [file essd-13-1073-2021-supplement.pdf]

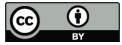

*Supplement of*

## **A comparative study of anthropogenic CH<sub>4</sub> emissions over China based on the ensembles of bottom-up inventories**

**Xiaohui Lin et al.**

*Correspondence to:* Xiaohui Lin (linxh@mail.iap.ac.cn) and Wen Zhang (zhw@mail.iap.ac.cn)

The copyright of individual parts of the supplement might differ from the article licence.

## Contents

|                                                                                                                                                                    |    |
|--------------------------------------------------------------------------------------------------------------------------------------------------------------------|----|
| Table S1 Source categories for each sector among different inventories. ....                                                                                       | 3  |
| Table S1 Continued.....                                                                                                                                            | 4  |
| Table S2 Sectoral and sub-sectoral CH <sub>4</sub> emissions of China among different inventories in 2010....                                                      | 5  |
| Table S3 Spatial proxy datasets and resolutions used by different inventories. ....                                                                                | 6  |
| Table S4 Emission factors for different source categories among different inventories. ....                                                                        | 7  |
| Table S5 Emission factors for coal exploitation at the province-level .....                                                                                        | 10 |
| Table S6 Emission factors for manure management (kg head <sup>-1</sup> yr <sup>-1</sup> ).....                                                                     | 11 |
| Fig. S1 Province names and their geographical locations. ....                                                                                                      | 12 |
| Fig. S2 Fraction changes of agriculture, energy and waste for EDGAR, EPA, FAO, GAINS, NCCC, PKU, REAS<br>and Yue from 1990 to latest years for each inventory..... | 13 |
| Fig. S3 CH <sub>4</sub> Emissions of rice production and livestock for EDGAR, CEDS, PKU and FAO from 1990 to 2019.<br>.....                                        | 14 |
| Fig. S4 Changes of CH <sub>4</sub> emissions of energy for buildings (a) and energy sector (b) in EDGAR from 2000 to<br>2010.....                                  | 15 |
| References:.....                                                                                                                                                   | 16 |

**Table S1 Source categories for each sector among different inventories.**

| Sector categories | PKU                   | CEDS                                                                                          | EDGAR                                         | GAINS                        | REAS                 | NCCC                     |
|-------------------|-----------------------|-----------------------------------------------------------------------------------------------|-----------------------------------------------|------------------------------|----------------------|--------------------------|
| Agriculture       | Rice cultivation      | Rice cultivation                                                                              | Agricultural soils                            | Agriculture                  | Rice cultivation     | Rice cultivation         |
|                   | Livestock             | Enteric fermentation                                                                          | Agricultural waste burning                    | Burning of crop residues     | Enteric fermentation | Enteric fermentation     |
|                   |                       | Manure management                                                                             | Enteric fermentation                          | Manure management            | Manure management    | Manure management        |
| Energy            | Coal mining           | Fugitive-solid-fuels                                                                          | Power industry                                | Energy production            | Fugitive_coal        | Coal mining              |
|                   | Fuel combustion       | Fugitive-other-energy                                                                         | Oil refineries and<br>Transformation industry | Domestic                     | Fugitive_gas         | Fuel combustion          |
|                   |                       | Fugitive_oil_gas                                                                              | Fugitive-petr-and-gas                         | Combustion for manufacturing | Transportation       | Fugitive_oil             |
|                   | Energy-transformation | Stationary_RCO<br>Chemical-industry<br>Metals-industry<br>Transportation<br>Fossil-fuel-fires | Road transportation                           | Road transportation          | Other mobile         | International navigation |
|                   |                       |                                                                                               | Railways, pipelines, off-road<br>transport    | Shipping                     | Other_transport      |                          |
|                   |                       |                                                                                               | Energy for buildings                          | Power_plant_point            |                      |                          |
|                   |                       |                                                                                               | Fuel exploitation COAL                        | Road_transport               |                      |                          |
|                   |                       |                                                                                               | Fuel exploitation OIL                         | Aviation                     |                      |                          |
|                   |                       |                                                                                               | Fuel exploitation GAS                         | Domestic                     |                      |                          |
|                   |                       |                                                                                               | Fossil Fuel Fires                             |                              |                      |                          |
|                   |                       |                                                                                               |                                               |                              |                      |                          |
| Waste treatment   | Landfills             | Soild-waste-disposal                                                                          | Solid waste landfills                         | Waste                        | Waste                | Landfills                |
|                   | Wastewater            | Wastewater-handling                                                                           | Solid waste incineration                      |                              |                      | Wastewater               |

**Table S1 Continued.**

| Sector categories | EPA                  | FAO                                  | GMB_BU                | CHRED                    | Huang et al.(2019)       | Yue et al.(2012)         | Zhang et al.(2014;2016;2018)                               |
|-------------------|----------------------|--------------------------------------|-----------------------|--------------------------|--------------------------|--------------------------|------------------------------------------------------------|
| Agriculture       | Rice cultivation     | Rice cultivation                     | Rice cultivation      | Rice cultivation         | Rice cultivation         | Rice cultivation         | Rice cultivation                                           |
|                   | Enteric fermentation | Enteric fermentation                 | Enteric fermentation  | Enteric fermentation     | Enteric fermentation     | Enteric fermentation     | Enteric fermentation                                       |
|                   | Manure management    | Manure management                    | Manure management     | Manure management        | Manure management        | Manure management        | Manure management                                          |
|                   |                      | Burning of crop residues and savanna |                       | Burning of crop residues | Burning of crop residues | Burning of crop residues |                                                            |
| Energy            | Coal mining          | energy                               | Coal mining           | Coal mining              | Coal mining              | Coal mining              | Coal mining                                                |
|                   | Fugitive_oil_gas     |                                      | Gas, Oil and Industry |                          | Fugitive_oil_gas         |                          | Fugitive_oil_gas<br>Fuel combustion<br>Bio-fuel combustion |
| Waste treatment   | Landfills            | Waste                                | Landfills and waste   | Landfills                | Landfills                | Waste                    | Landfills                                                  |
|                   | Wastewater           |                                      |                       | Wastewater               | Industrial wastewater    |                          | Industrial wastewater                                      |
|                   |                      |                                      |                       |                          |                          |                          | Domestic sewage                                            |

**Table S2 Sectoral and sub-sectoral CH<sub>4</sub> emissions of China among different inventories in 2010.**

| Sector                 | PKU          | CEDS         | EDGAR        | NCCC         | FAO          | GAINS        | Zhang et al.<br>(2016) | Zhang et al.<br>(2017) | Zhu et al.<br>(2017) | Sheng et<br>al. (2019) | Mean         | SD          |
|------------------------|--------------|--------------|--------------|--------------|--------------|--------------|------------------------|------------------------|----------------------|------------------------|--------------|-------------|
| <b>China</b>           | <b>44.80</b> | <b>47.59</b> | <b>57.46</b> | <b>53.69</b> | <b>51.30</b> | <b>47.64</b> | <b>44.35</b>           | <b>NA</b>              | <b>NA</b>            | <b>NA</b>              | <b>49.55</b> | <b>4.47</b> |
| <b>Agriculture</b>     | 18.75        | 16.36        | 23.29        | 22.43        | 14.10        | 16.18        | 16.02                  | 20.56                  | NA                   | NA                     | 18.46        | 3.13        |
| Livestock              | 11.41        | 11.11        | 9.38         | 13.38        | 8.86         | NA           | 10.04                  | 12.37                  | NA                   | NA                     | 10.94        | 1.50        |
| Rice cultivation       | 7.34         | 5.25         | 13.90        | 8.73         | 5.25         | NA           | 5.61                   | 8.19                   | NA                   | NA                     | 7.75         | 2.83        |
| <b>Energy</b>          | 21.75        | 20.59        | 23.74        | 26.86        | 26.80        | 25.95        | 22.10                  | NA                     | NA                   | NA                     | 23.97        | 2.40        |
| Coal mining            | 18.97        | 17.78        | 17.31        | 22.87        | NA           | NA           | 19.32                  | NA                     | 16.00                | 15.20                  | 18.21        | 2.34        |
| Other                  | 2.78         | 2.81         | 6.43         | 3.99         | NA           | NA           | 2.77                   | NA                     | NA                   | NA                     | 3.76         | 1.41        |
| <b>Waste treatment</b> | 4.29         | 10.64        | 10.43        | 4.40         | 10.40        | 5.51         | 6.23                   | NA                     | NA                   | NA                     | 7.42         | 2.73        |
| Wastewater             | 2.27         | 7.78         | 7.68         | 2.19         | NA           | NA           | 2.28                   | NA                     | NA                   | NA                     | 4.44         | 2.68        |
| Landfills              | 2.02         | 2.87         | 2.75         | 2.21         | NA           | NA           | 3.95                   | NA                     | NA                   | NA                     | 2.76         | 0.68        |

**Table S3 Spatial proxy datasets and resolutions used by different inventories.**

| Sub-sector        | Inventory | Proxy data                                                                                                                                                                                                                                                                                                                                                                                                                                          | Spatial resolution | References                                                                                                                                                                                                                                                                                                                                            |
|-------------------|-----------|-----------------------------------------------------------------------------------------------------------------------------------------------------------------------------------------------------------------------------------------------------------------------------------------------------------------------------------------------------------------------------------------------------------------------------------------------------|--------------------|-------------------------------------------------------------------------------------------------------------------------------------------------------------------------------------------------------------------------------------------------------------------------------------------------------------------------------------------------------|
| Livestock         | PKU       | Gridded data for numbers of animals in 2005                                                                                                                                                                                                                                                                                                                                                                                                         | 1 km x 1 km        | Robinson et al. (2011)                                                                                                                                                                                                                                                                                                                                |
|                   | EDGAR     | Animals: buffaloes, cattles, goats, pigs, sheeps. FAO Geonetwork (2014):<br><a href="http://livestock.geo-wiki.org/">http://livestock.geo-wiki.org/</a> and with for buffaloes:<br><a href="http://www.fao.org/AG/AGInfo/resources/en/glw/GLW_dens.html">http://www.fao.org/AG/AGInfo/resources/en/glw/GLW_dens.html</a>                                                                                                                            | 0.1° x 0.1°        | livestock: <a href="http://livestock.geo-wiki.org/">http://livestock.geo-wiki.org/</a> ; buffaloes:<br><a href="http://www.fao.org/AG/AGInfo/resources/en/glw/GLW_dens.html">http://www.fao.org/AG/AGInfo/resources/en/glw/GLW_dens.html</a>                                                                                                          |
|                   | Lin       | County data: diary and non-diary cattles, buffaloes, goats, sheeps, pigs; Land use data for grassland and rural settlements                                                                                                                                                                                                                                                                                                                         | 10 km x 10 km      | Lin et al. (2011)                                                                                                                                                                                                                                                                                                                                     |
| Rice cultivation  | PKU       | Gridded harvested area of rice                                                                                                                                                                                                                                                                                                                                                                                                                      | 0.083° x 0.083°    | Monfreda et al. (2008)                                                                                                                                                                                                                                                                                                                                |
|                   | EDGAR     | Ramankutty (2008) agricultural land and crop type mask                                                                                                                                                                                                                                                                                                                                                                                              |                    | Ramankutty et al. (2008)                                                                                                                                                                                                                                                                                                                              |
|                   | Zhang     | Process-based model: Gridded harvested area of rice                                                                                                                                                                                                                                                                                                                                                                                                 | 0.083° x 0.083°    | Zhang et al. (2017)                                                                                                                                                                                                                                                                                                                                   |
| Coal exploitation | PKU       | Annual production from 4264 coal production sites                                                                                                                                                                                                                                                                                                                                                                                                   | 0.1° x 0.1°        | Liu et al. (2015)                                                                                                                                                                                                                                                                                                                                     |
|                   | MIT       | More than 10000 coal mines in China for 2011                                                                                                                                                                                                                                                                                                                                                                                                        | 0.25° x 0.25°      | Sheng et al. (2019)                                                                                                                                                                                                                                                                                                                                   |
|                   | EDGAR     | Brown and hard coal. USGS (2014); EPRTv4.2 (2012); Liu et al. (2015):<br>Combining USGS coal mines ( <a href="https://www.usgs.gov/">https://www.usgs.gov/</a> ) and EPRTv4.2 for<br>European mines ( <a href="http://prtr.ec.europa.eu">http://prtr.ec.europa.eu</a> ) and Global Energy Observatory<br>( <a href="http://globalenergyobservatory.org">http://globalenergyobservatory.org</a> ) and China coal mine data from Liu et al.<br>(2015) | 0.1° x 0.1°        | Janssens-Maenhout et al. (2019)<br>In-house EDGAR proxy based on EPRTv4.2<br>( <a href="http://prtr.ec.europa.eu">http://prtr.ec.europa.eu</a> ) and USGS<br>( <a href="https://www.usgs.gov/">https://www.usgs.gov/</a> ) and Global Energy<br>Observatory ( <a href="http://globalenergyobservatory.org/">http://globalenergyobservatory.org/</a> ) |
|                   | Harvard   | EDGAR v4.3.2 emission grid maps for 2012                                                                                                                                                                                                                                                                                                                                                                                                            | 0.1° x 0.1°        | Janssens-Maenhout et al. (2019)                                                                                                                                                                                                                                                                                                                       |

|                     |         |                                                                                                                                                                                                                                                                                                                              |             |                                                                                                                                                                                                                                                                                                            |
|---------------------|---------|------------------------------------------------------------------------------------------------------------------------------------------------------------------------------------------------------------------------------------------------------------------------------------------------------------------------------|-------------|------------------------------------------------------------------------------------------------------------------------------------------------------------------------------------------------------------------------------------------------------------------------------------------------------------|
| Oil and gas systems | PKU     | EDGARv42 gridded 1B2a subcategory                                                                                                                                                                                                                                                                                            | 0.1° x 0.1° | EDGARv42; Schwietzke et al. (2014)                                                                                                                                                                                                                                                                         |
|                     | EDGAR   | In-house EDGAR proxy based on <a href="https://www.ngdc.noaa.gov/eog/viirs.html">https://www.ngdc.noaa.gov/eog/viirs.html</a> ; World Port Index (PUB 150) ( <a href="http://msi.nga.mil/MSISiteContent/StaticFiles/NAV_PUBS/WPI/Pub150bk.pdf">http://msi.nga.mil/MSISiteContent/StaticFiles/NAV_PUBS/WPI/Pub150bk.pdf</a> ) | 0.1° x 0.1° | Janssens-Maenhout et al. (2019)                                                                                                                                                                                                                                                                            |
|                     | Harvard | Global distributions of oil, gas wells, and pipelines                                                                                                                                                                                                                                                                        | 0.1° x 0.1° | Global distributions of oil and gas wells (Enverus (2017); Rose (2017)), pipelines (EIA (); Petroleum Economist Ltd. (2010); (Sheng et al., 2017); Sabbatino et al. (2017)), and midstream facilities Sabbatino et al. (2017)                                                                              |
| Landfills           | PKU     | Gridded total population in 2005 and 2010                                                                                                                                                                                                                                                                                    | 1 km x 1 km | Huang et al. (2014)                                                                                                                                                                                                                                                                                        |
|                     | EDGAR   | In-house EDGAR proxy based on EPRTRv4.2 European landfills ( <a href="http://prtr.ec.europa.eu">http://prtr.ec.europa.eu</a> ) and CEC ( <a href="http://takingstock.cec.org/">http://takingstock.cec.org/</a> ) (gapfilled with urban population)                                                                           | 0.1° x 0.1° | In-house EDGAR proxy based on EPRTR ( <a href="http://prtr.ec.europa.eu">http://prtr.ec.europa.eu</a> ) and CEC ( <a href="http://takingstock.cec.org/">http://takingstock.cec.org/</a> )                                                                                                                  |
| Wastewater          | PKU     | Gridded total population in 2005 and 2010                                                                                                                                                                                                                                                                                    | 1 km x 1 km | Huang et al. (2014)                                                                                                                                                                                                                                                                                        |
|                     | EDGAR   | In-house EDGAR proxy based on CIESIN GWPv3 population and settlements map (5 year timesteps from 1990 onwards) <a href="http://sedac.ciesin.columbia.edu/(rural pop.=total pop.-urban pop.)">http://sedac.ciesin.columbia.edu/(rural pop.=total pop.-urban pop.)</a>                                                         | 0.1° x 0.1° | In-house EDGAR proxy based on EPRTR ( <a href="http://prtr.ec.europa.eu">http://prtr.ec.europa.eu</a> ) and CEC ( <a href="http://takingstock.cec.org/">http://takingstock.cec.org/</a> ); In-house EDGAR proxy based on <a href="http://sedac.ciesin.columbia.edu/">http://sedac.ciesin.columbia.edu/</a> |

**Table S4 Emission factors for different source categories among different inventories.**

| Major sectors | Items | IPCC | EDGAR | PKU | FAO | NCCC | GAINS | (Huang et al., 2019) | (Zhang and Chen, | (Zhang et al., |
|---------------|-------|------|-------|-----|-----|------|-------|----------------------|------------------|----------------|
|---------------|-------|------|-------|-----|-----|------|-------|----------------------|------------------|----------------|

|             |                                                      |           |               |                  |       |      |            | 2014)      | 1999) |
|-------------|------------------------------------------------------|-----------|---------------|------------------|-------|------|------------|------------|-------|
| Energy      | Coal mining_underground (m3/t)                       | 18.0      | 10.0          | 8.23(5.58-20.35) | 8.89  | 9.3  | 4.53-21.83 | 4.53-21.83 | 11.0  |
|             | Coal mining_underground_post (m3/t)                  | 2.5       | 0.9           | 1.18-1.30        |       | 2.5  | NA         | 1.13-3.02  | 1.8   |
|             | Coal mining_open (m3/t)                              | 1.2       | NA            | 2.5              |       | NA   | 2.5        | 2.5        | 2.5   |
|             | Coal mining_open_post (m3/t)                         | 0.1       | NA            | NA               |       | NA   | NA         | 0.1        | 0.1   |
|             | Oil (kg/t)                                           | 4.9       | 96.4(kg/TJ)*  | 3.3              |       |      | 0.4        | 1.0        | 0.4   |
|             | Gas (%)                                              | 2.0       | 144.3(kg/TJ)* | 2.0-4.6          |       |      | 0.3        | 0.6        | 0.3   |
| Agriculture | Dairy cattle_Enteric_Fermentation (kg/head/year)     | 68.0      | 77.2          | 54(46-64)        | 68.0  | 56.0 | 65.3       | 65.3       | 52.7  |
|             | Non-dairy cattle_Enteric_Fermentation (kg/head/year) | 47.0      | 64.2          | 53(39-53)        | 47.0  | 44.0 | 54.2       | 54.2       | 40.5  |
|             | Buffalo_Enteric_Fermentation (kg/head/year)          | 55.0      | 55.0          | 57(47-62)        | 55.0  | 57.0 | 72.9       | 72.9       | 53.5  |
|             | Sheep_Enteric_Fermentation (kg/head/year)            | 5.0       | 5.0           | 5(5-7)           | 5.0   | 5.0  | 5.3        | 5.3        | 5.4   |
|             | Goats_Enteric_Fermentation (kg/head/year)            | 5.0       | 5.0           | 4(4-6)           | 5.0   | NA   | 4.6        | 4.6        | 5.4   |
|             | Swine_Enteric_Fermentation (kg/head/year)            | 1.0       | 1.0           | 1.0              | 1.0   | NA   | 1.0        | 1.0        | NA    |
|             | Dairy cattle_Manure (kg/head/year)                   | 10.0      | 11.5          | 18(9-26)         | 9.1   | 16.0 |            | 9.0        |       |
|             | Non-dairy cattle_Manure (kg/head/year)               | 1.0       | 1.0           | 1.0              | 1.0   | 1.0  |            | 0.9        |       |
|             | Buffalo_Manure (kg/head/year)                        | 1-2       | 1.3           | 1-2              | 1.0   | 2.0  |            | 1.8        |       |
|             | Sheep_Manure (kg/head/year)                          | 0.10-0.15 | 0.12          | 0.10-0.15        | 0.1   | 0.2  |            | 0.1        |       |
|             | Goats_Manure (kg/head/year)                          | 0.11-0.17 | 0.13          | 0.11-0.17        | 0.1   | NA   |            | 0.1        |       |
|             | Swine_Manure (kg/head/year)                          | 2-5       | 2.4           | 2-5              | 2.0   | NA   |            | 3.1        |       |
|             | Rice_High (g/m2/d)                                   | 0.1       | 1.4           | 0.3              | 0.21  | 0.1  | NA         | 0.6        | 0.0   |
|             | Rice_Low g/m2/d                                      | 0.3       | 0.1           | 0.2              | 0.005 | 0.1  | NA         | 0.1        | 0.6   |
| Waste       | Landfill_EF (%(t/t))                                 | 15.0      | 15.0          |                  |       |      | NA         | 2.1        | 3.2   |
|             | Landfill_MCF                                         | 0.4-1.0   |               | 0.4-1.0          |       |      |            | 0.7-0.95   |       |
|             | Waste water_domestic sewage                          | 0.2       | 0.2           | 0.2              |       |      | 0.2        | 0.2        | NA    |



Waste water\_industrial wastewater

0.5

0.5

0.5

0.5

0.5

NA

---

\*Implied EF for energy (combustion+fuel exploitation) in EDGAR

**Table S5 Emission factors for coal exploitation at the province-level**

| Province       | Coal mining from underground coal mines(m3/ton) (Peng et al. (2016); Zheng et al. (2006)) |       |       | Coal exploitation (m3/ton) (Sheng et al. (2019)) |                 |      |                 |       |                 | Coal mining from underground coal mines(m3/ton) (Zhu et al. (2017)) |       |       |       |       |
|----------------|-------------------------------------------------------------------------------------------|-------|-------|--------------------------------------------------|-----------------|------|-----------------|-------|-----------------|---------------------------------------------------------------------|-------|-------|-------|-------|
|                | Mean                                                                                      | 1994  | 2000  | Mean                                             | Uncertainty (%) | Low  | Uncertainty (%) | High  | Uncertainty (%) | 2006                                                                | 2007  | 2008  | 2009  | 2010  |
| Beijing        | 5.58                                                                                      | 4.18  | 6.97  | 1.43                                             | 0.48            | 1.43 | 0.48            | NA    | NA              | 0.74                                                                | 0.74  | 0.74  | 0.74  | 0.74  |
| Hebei          | 5.58                                                                                      | 4.18  | 6.97  | 9.74                                             | 0.87            | 2.88 | 0.74            | 16.60 | 1.00            | 4.89                                                                | 4.74  | 4.60  | 4.47  | 4.34  |
| Shanxi         | 5.58                                                                                      | 4.18  | 6.97  | 12.70                                            | 0.67            | 3.34 | 0.69            | 22.05 | 0.65            | 6.48                                                                | 6.49  | 6.49  | 6.50  | 6.51  |
| Inner Mongolia | 5.99                                                                                      | 6.00  | 5.97  | 10.01                                            | 0.80            | 1.45 | 1.00            | 18.56 | 0.59            | 0.72                                                                | 0.75  | 0.77  | 0.79  | 0.82  |
| Liaoning       | 13.08                                                                                     | 11.75 | 14.40 | 6.24                                             | 1.00            | 0.46 | 1.00            | 12.01 | 1.00            | 13.28                                                               | 12.99 | 12.70 | 12.42 | 12.14 |
| Jilin          | 13.08                                                                                     | 11.75 | 14.40 | 8.64                                             | 0.42            | 5.48 | 0.46            | 11.80 | 0.38            | 6.86                                                                | 6.71  | 6.57  | 6.43  | 6.29  |
| Heilongjiang   | 13.08                                                                                     | 11.75 | 14.40 | 12.02                                            | 0.65            | 3.51 | 0.66            | 20.53 | 0.64            | 10.04                                                               | 10.77 | 11.57 | 12.42 | 13.33 |
| Jiangsu        | 5.84                                                                                      | 5.46  | 6.22  | 5.02                                             | 0.60            | 2.70 | 0.73            | 7.34  | 0.47            | 5.22                                                                | 5.06  | 4.90  | 4.75  | 4.60  |
| Anhui          | 5.84                                                                                      | 5.46  | 6.22  | 7.25                                             | 0.58            | 3.87 | 0.43            | 10.62 | 0.73            | 26.57                                                               | 25.55 | 24.57 | 23.62 | 22.71 |
| Fujian         | 5.84                                                                                      | 5.46  | 6.22  | 4.02                                             | 0.42            | 4.02 | 0.42            | NA    | NA              | 0.74                                                                | 0.74  | 0.74  | 0.74  | 0.74  |
| Jiangxi        | 5.84                                                                                      | 5.46  | 6.22  | 11.28                                            | 0.39            | 6.14 | 0.30            | 16.42 | 0.48            | 14.68                                                               | 14.05 | 13.45 | 12.88 | 12.33 |
| Shandong       | 5.58                                                                                      | 4.18  | 6.97  | 5.83                                             | 0.57            | 1.93 | 0.71            | 9.73  | 0.42            | 0.97                                                                | 1.00  | 1.02  | 1.05  | 1.08  |
| Henan          | 7.51                                                                                      | 7.19  | 7.83  | 8.02                                             | 0.61            | 3.41 | 0.61            | 12.63 | 0.61            | 13.48                                                               | 13.42 | 13.36 | 13.30 | 13.24 |
| Hubei          | 7.51                                                                                      | 7.19  | 7.83  | 11.55                                            | 0.47            | 5.04 | 0.41            | 18.05 | 0.52            | 6.29                                                                | 6.48  | 6.68  | 6.88  | 7.09  |
| Hunan          | 7.51                                                                                      | 7.19  | 7.83  | 17.00                                            | 0.40            | 6.42 | 0.31            | 27.57 | 0.49            | 12.12                                                               | 11.77 | 11.43 | 11.10 | 10.78 |

|           |       |       |       |       |      |      |      |       |      |       |       |       |       |       |
|-----------|-------|-------|-------|-------|------|------|------|-------|------|-------|-------|-------|-------|-------|
| Guangxi   | 7.51  | 7.19  | 7.83  | 13.82 | 0.27 | 5.52 | 0.45 | 22.12 | 0.08 | 1.79  | 1.51  | 1.28  | 1.08  | 0.91  |
| Chongqing | 20.35 | 19.02 | 21.68 | 17.73 | 0.41 | 6.65 | 0.26 | 28.80 | 0.56 | 31.89 | 32.14 | 32.39 | 32.64 | 32.89 |
| Sichuan   | 20.35 | 19.02 | 21.68 | 19.40 | 0.43 | 6.50 | 0.34 | 32.29 | 0.51 | 12.56 | 12.58 | 12.59 | 12.61 | 12.62 |
| Guizhou   | 20.35 | 19.02 | 21.68 | 19.48 | 0.40 | 7.66 | 0.24 | 31.30 | 0.56 | 27.75 | 27.19 | 26.63 | 26.09 | 25.56 |
| Yunnan    | 20.35 | 19.02 | 21.68 | 18.09 | 0.47 | 6.09 | 0.30 | 30.09 | 0.63 | 7.43  | 7.60  | 7.78  | 7.97  | 8.15  |
| Shaanxi   | 5.99  | 6.00  | 5.97  | 12.26 | 0.81 | 2.46 | 0.84 | 22.06 | 0.78 | 6.36  | 5.37  | 4.54  | 3.83  | 3.24  |
| Gansu     | 5.99  | 6.00  | 5.97  | 7.32  | 0.30 | 2.39 | 0.52 | 12.25 | 0.08 | 1.92  | 1.92  | 1.92  | 1.92  | 1.92  |
| Ningxia   | 5.99  | 6.00  | 5.97  | 16.44 | 0.85 | 1.71 | 1.00 | 31.16 | 0.69 | 8.99  | 8.99  | 8.99  | 8.99  | 8.99  |
| Xinjiang  | 5.99  | 6.00  | 5.97  | 8.33  | 0.51 | 2.92 | 0.54 | 13.73 | 0.47 | 3.14  | 3.14  | 3.14  | 3.14  | 3.14  |

**Table S6 Emission factors for manure management (kg head<sup>-1</sup> yr<sup>-1</sup>).**

| Category         | CCCCS (2000)      |                             |                   |         | IPCC (2006)/Peng et al. (2016) |           |       | Zhou et al. (2007) |
|------------------|-------------------|-----------------------------|-------------------|---------|--------------------------------|-----------|-------|--------------------|
|                  | Cool (MAT ≤ 14C°) | Temperate (15 ≤ MAT ≤ 25C°) | Warm (MAT ≥ 26C°) | Average | Cool                           | Temperate | Warm  |                    |
| Non-dairy cattle | 0.65              | 0.92                        | 1.97              | 0.77    | 1                              | 1         | 1     | 0.92               |
| Dairy cattle     | 7.65              | 16.36                       | 26.17             | 8.87    | 9–12                           | 13–26     | 28–31 | 8.95               |
| Buffalo          | 0.92              | 1.07                        | 2.35              | 1.07    | 1                              | 2         | 2     | 1.8                |
| Sheep            | 0.10              | 0.15                        | 0.20              | 0.10    | 0.1                            | 0.15      | 0.2   | 0.1                |
| Goats            | 0.11              | 0.17                        | 0.22              | 0.13    | 0.11                           | 0.17      | 0.22  | 0.13               |
| Pigs             | 1.26              | 3.74                        | 7.09              | 3.05    | 2                              | 3–6       | 6–7   | 1.53               |

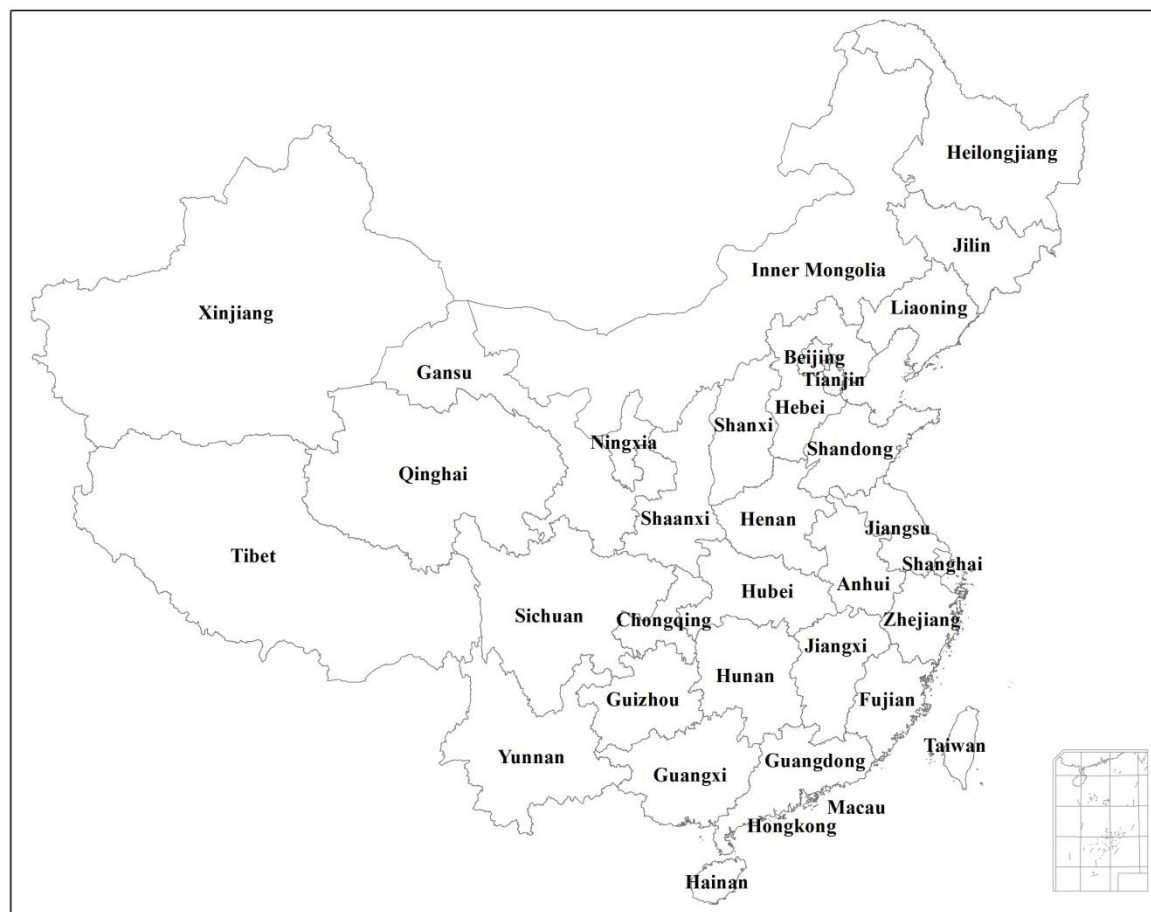

**Fig. S1 Province names and their geographical locations.**

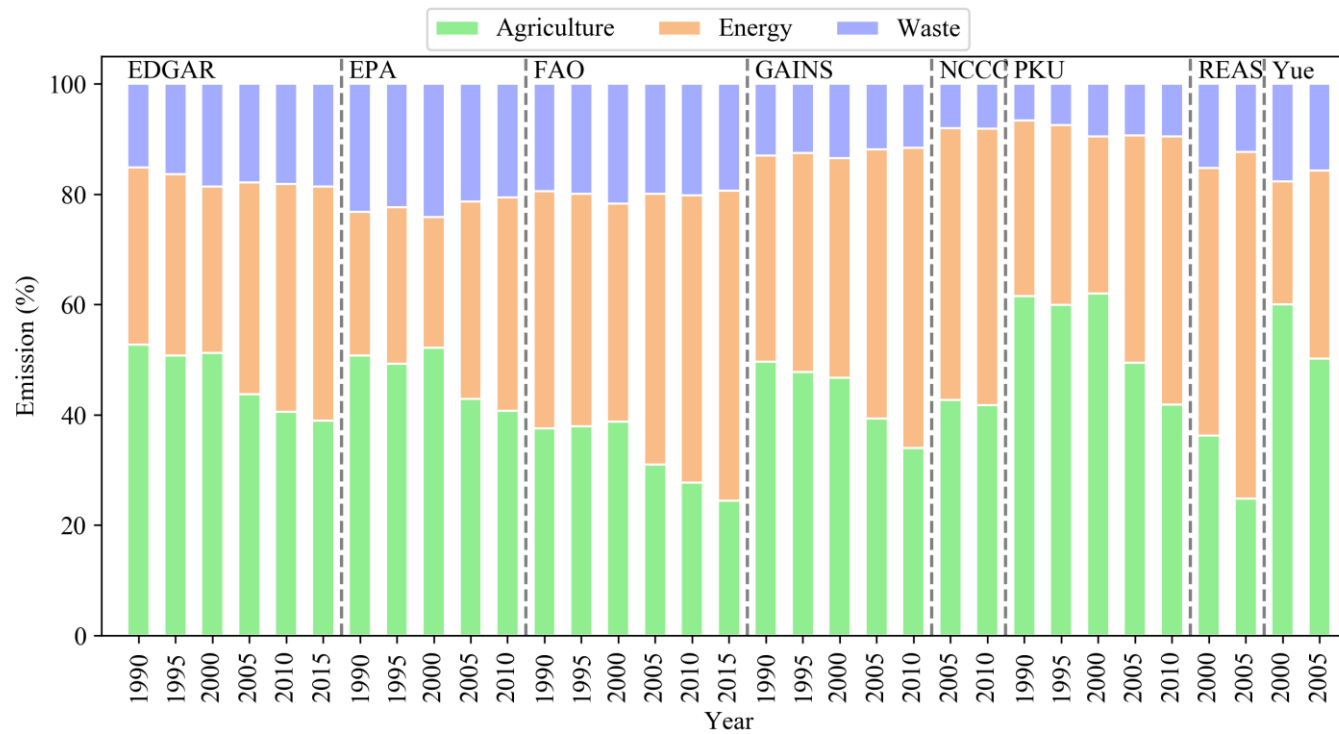

**Fig. S2 Fraction changes of agriculture, energy and waste for EDGAR, EPA, FAO, GAINS, NCCC, PKU, REAS and Yue from 1990 to latest years**

**for each inventory.**

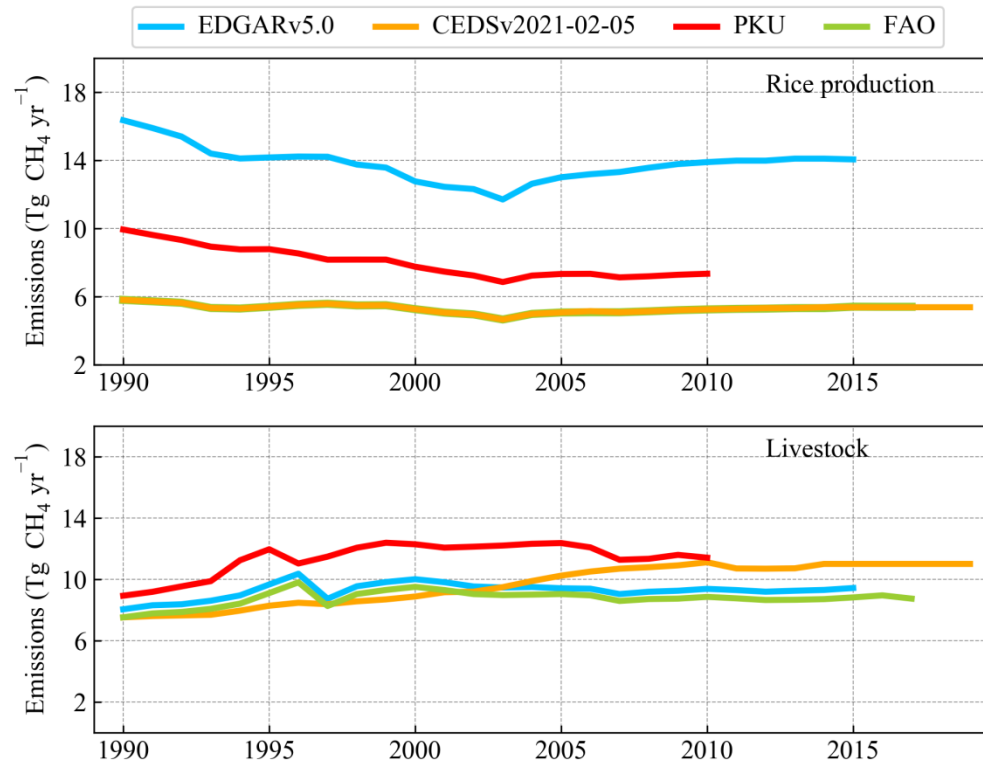

Fig. S3 CH<sub>4</sub> Emissions of rice production and livestock for EDGAR, CEDS, PKU and FAO from 1990 to 2019.

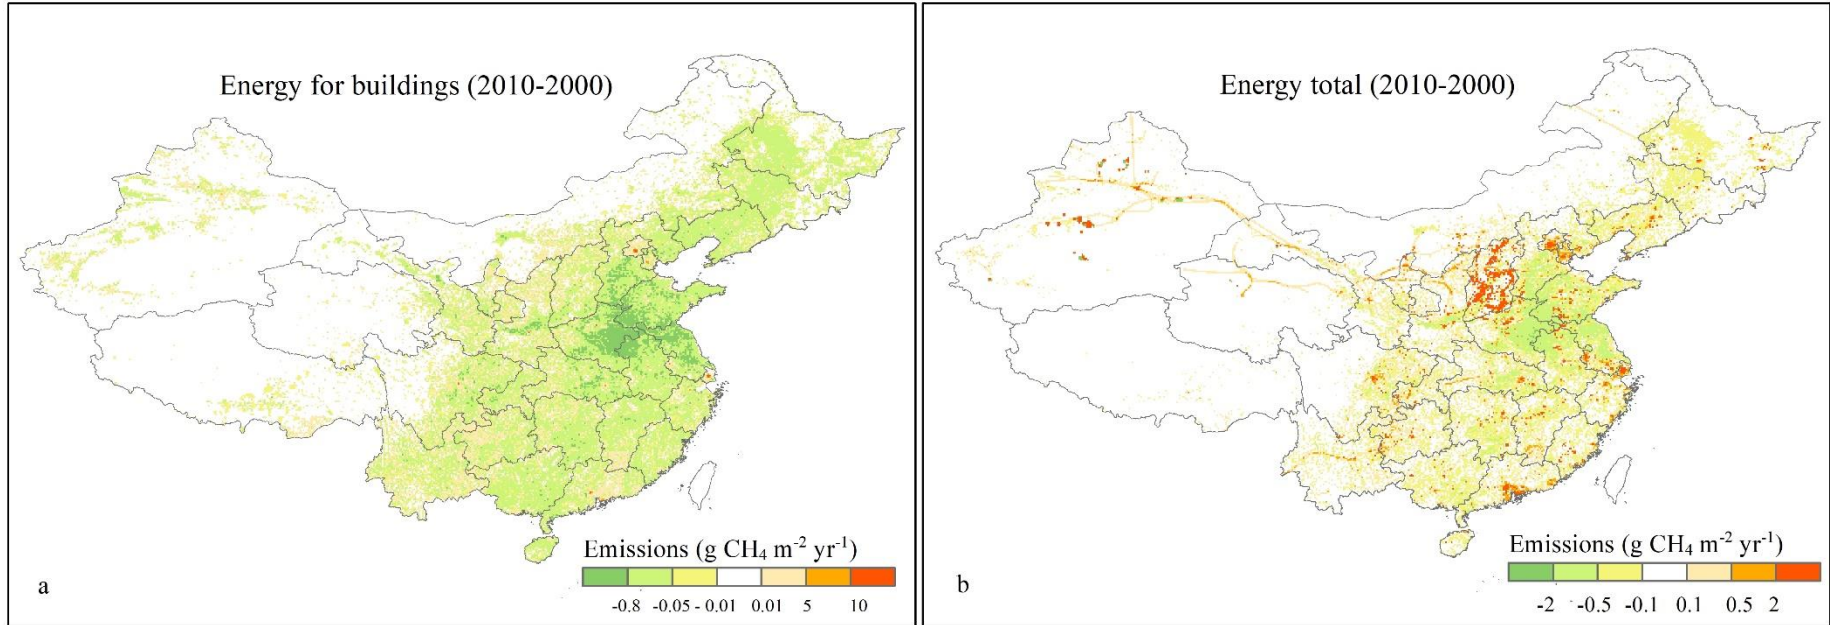

**Fig. S4 Changes of CH<sub>4</sub> emissions of energy for buildings (a) and energy sector (b) in EDGAR from 2000 to 2010.**

## References:

- CCCCS: China climate change country study. Beijing: Tsinghua University Press; (in Chinese), 2000.
- EIA: U.S. Energy Mapping System, available at: <https://www.eia.gov/state/maps.php>, last access: June 2018.
- Enverus: Enverus International, available at: <http://drillinginfo.com/>, last access: June 2017., 2017.
- Hoesly, R. M., Smith, S. J., Feng, L., Klimont, Z., Janssens-Maenhout, G., Pitkanen, T., Seibert, J. J., Vu, L., Andres, R. J., and Bolt, R. M.: Historical (1750-2014) anthropogenic emissions of reactive gases and aerosols from the Community Emission Data System (CEDS), *Geoscientific Model Development*, 11, 369-408, 2018.
- Huang, M., Wang, T., Zhao, X., Xie, X., and Wang, D.: Estimation of atmospheric methane emissions and its spatial distribution in China during 2015, *Acta Scientiae Circumstantiae* (in Chinese), 39, 1371-1380, 2019.
- Huang, Y. H., Jiang, D., and Fu, J. Y.: 1 km grid GDP data of China (2005, 2010), *Acta Geographica Sinica*, 69, 140 - 143, doi: 10.3974/geodb.2014.01.07.v1, 2014.
- IPCC: The 2006 IPCC guidelines for national greenhouse gas inventories (2006 guidelines), 2006.
- Janssens-Maenhout, G., Crippa, M., Guizzardi, D., Muntean, M., Schaaf, E., Dentener, F., Bergamaschi, P., Pagliari, V., Olivier, J. G., and Peters, J. A.: EDGAR v4. 3.2 Global Atlas of the three major greenhouse gas emissions for the period 1970–2012, *Earth System Science Data*, 11, 959-1002, 2019.
- Lin, Y., Zhang, W., and Huang, Y.: Estimating spatiotemporal dynamics of methane emissions from livestock in China, *Environmental Science* (in Chinese), 32, 2212-2220, 2011.
- Liu, Z., Guan, D., Wei, W., Davis, S. J., Ciais, P., Bai, J., Peng, S., Zhang, Q., Hubacek, K., and Marland, G.: Reduced carbon emission estimates from fossil fuel combustion and cement production in China, *Nature*, 524, 335-338, 2015.
- Monfreda, C., Ramankutty, N., and Foley, J. A.: Farming the planet: 2. Geographic distribution of crop areas, yields, physiological types, and net primary production in the year 2000, *Global biogeochemical cycles*, 22, 2008.
- Peng, S., Piao, S., Bousquet, P., Ciais, P., Li, B., Lin, X., Tao, S., Wang, Z., Zhang, Y., and Zhou, F.: Inventory of anthropogenic methane emissions in mainland China from 1980 to 2010, *Atmos. Chem. Phys.*, 16, 14545-14562, 2016.
- Petroleum Economist Ltd.: Oil & Gas Map of Russia/Eurasia & Pacific Markets, 1st Edn., Petroleum Economist Ltd in association with VTB Capital, London, UK, 2010.
- Ramankutty, N., Evan, A. T., Monfreda, C., and Foley, J. A.: Farming the planet: 1. Geographic distribution of global agricultural lands in the year 2000, *Global Biogeochemical Cycles*, 22, -, 2008.
- Robinson, T. P., Thornton, P. K., Franceschini, G., Kruska, R. L., Chiozza, F., Notenbaert, A., Cecchi, G., Herrero, M., Epprecht, M., Fritz, S., You, L., Conchedda, G., and See, L.: Global Livestock Production Systems. FAO and ILRI, Rome. ISBN 978-92-5-107033-8. Available at: <http://www.fao.org/docrep/014/i2414e/i2414e00.htm> 2011.
- Rose, K. K.: Signatures in the Subsurface – Big & Small Data Approaches for the Spatio-Temporal Analysis of Geologic Properties & Uncertainty Reduction, Oregon State University, available



at:[https://ir.library.oregonstate.edu/concern/graduate\\_thesis\\_or\\_dissertations/2j62s975z](https://ir.library.oregonstate.edu/concern/graduate_thesis_or_dissertations/2j62s975z)(last access: August 2017), PhD thesis, 2017.

Sabbatino, M., Romeo, L., Baker, V., Bauer, J., Barkhurst, A., Bean, A., DiGiulio, J., Jones, K., Jones, T. J., Justman, D., Miller III, R., Rose, K., and Tong, A.: Global Oil & Gas Features Database, 2017-12-12, <https://edx.netl.doe.gov/dataset/global-oil-gas-features-database>, DOI: 10.18141/1427300, 2017.

Schwietzke, S., Griffin, W. M., Matthews, H. S., and Bruhwiler, L. M. P.: Global bottom-up fossil fuel fugitive methane and ethane emissions inventory for atmospheric modeling, *Acs Sustainable Chem Eng*, 2, 1992-2001, 2014.

Sheng, J., Song, S., Zhang, Y., Prinn, R. G., and Janssens-Maenhout, G.: Bottom-up estimates of coal mine methane emissions in China: a gridded inventory, emission factors, and trends, *Environmental Science & Technology Letters*, 6, 473-478, 2019.

Sheng, J. X., Jacob, D. J., Maasakkers, J. D., Sulprizio, M. P., Zavala-Araiza, D., and Hamburg, S. P.: A high-resolution ( $0.1^\circ \times 0.1^\circ$ ) inventory of methane emissions from Canadian and Mexican oil and gas systems, *Atmospheric Environment*, 158, 211-215, 2017.

Zhang, B. and Chen, G.: China's CH<sub>4</sub> and CO<sub>2</sub> emissions: Bottom-up estimation and comparative analysis, *Ecological indicators*, 47, 112-122, 2014.

Zhang, B., Yang, T., Chen, B., and Sun, X.: China's regional CH<sub>4</sub> emissions: Characteristics, interregional transfer and mitigation policies, *Applied energy*, 184, 1184-1195, 2016.

Zhang, R., Wang, M., Li, J., Yang, X., and Wang, X.: The present status of the emission methane in China, *Climatic and Environmental Research*, 4, 194-202, 1999.

Zhang, W., Sun, W., and Li, T.: Uncertainties in the national inventory of methane emissions from rice cultivation: field measurements and modeling approaches, *Biogeosciences*, 14, 163-176, 2017.

Zheng, S., Wang, Y. A., and Wang, Z. Y.: Methane emissions to atmosphere from coal mine in China, *Saf. Coal Mines*, 36, 29-33,(in Chinese), 2006.

Zhou, J. B., Jiang, M. M., and Chen, G. Q.: Estimation of methane and nitrous oxide emission from livestock and poultry in China during 1949-2003, *Energy Policy*, 35, 3759-3767, 2007.

Zhu, T., Bian, W., Zhang, S., Di, P., and Nie, B.: An improved approach to estimate methane emissions from coal mining in China, *Environmental Science & Technology*, 51, 12072-12080, 2017.
